# Supplementary material
Source: PubMed Central journal article supplement (PMC4009975)
Supplement: NIHMS458611-supplement-supplementary_data.pdf [file NIHMS458611-supplement-supplementary_data.pdf]

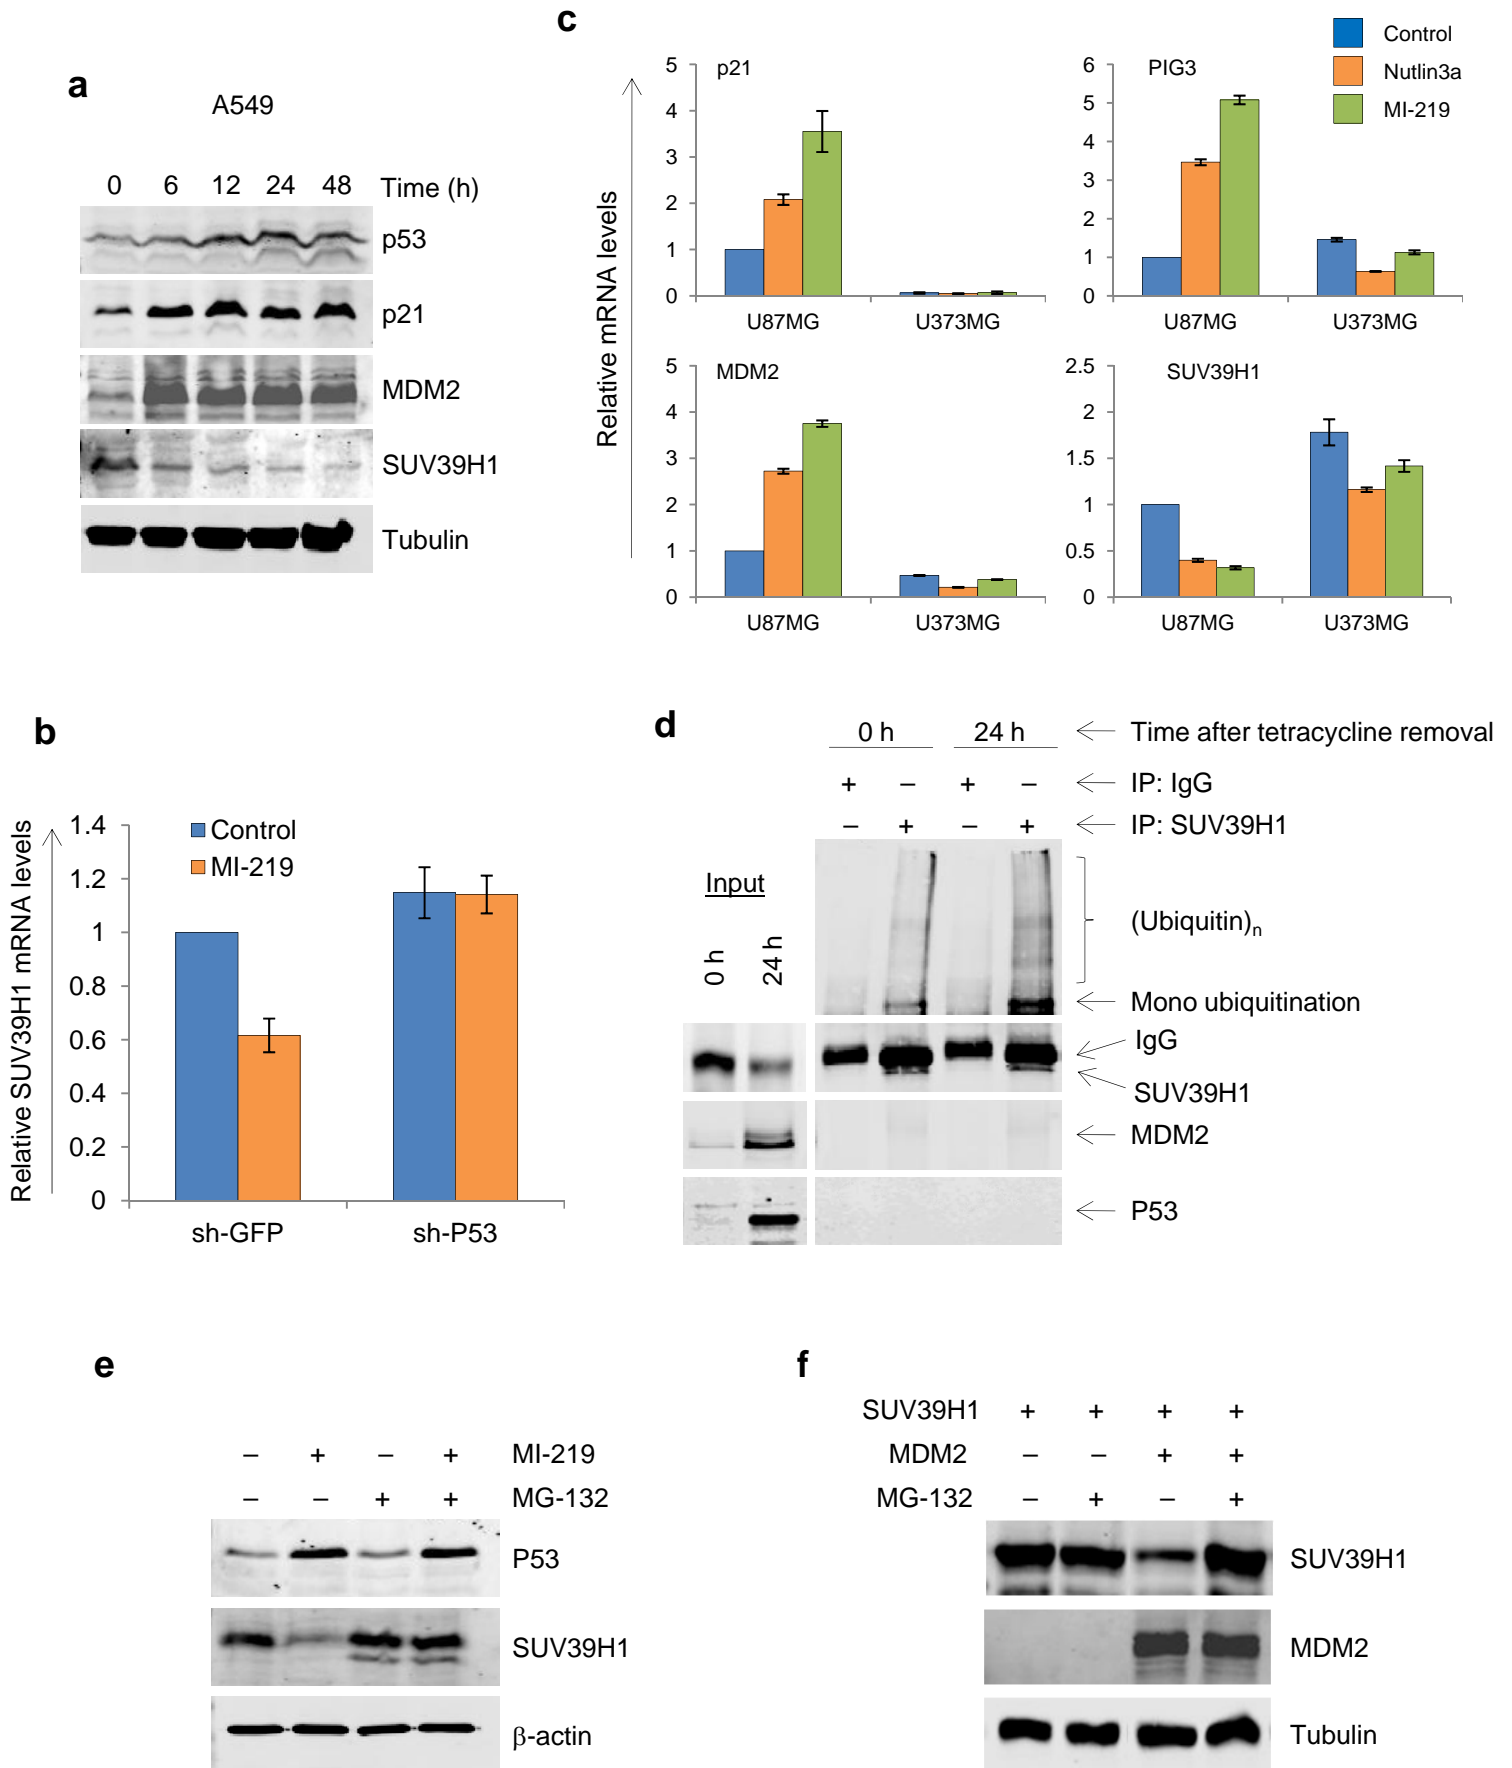

**Supplementary Figure 1: p53 downregulates SUV39H1 expression.** (a) Western blot analysis of A549 cells treated with hydrogen peroxide for the indicated time points. (b) Real time quantitative PCR of B5/589 cells expressing either sh-GFP or sh-p53 and treated with MI-219. (c) Real time quantitative PCR of U87MG (p53 WT) and U373MG (p53 mutant) glioblastoma cells treated with either Nutlin3a or MI-219. (d) Western blot analysis of SUV39H1 immunoprecipitated samples. EJ-p53 cells were induced for p53 expression and cell lysates were prepared after 24 h of induction. SUV39H1 protein was immunoprecipitated and loaded on a gradient SDS-PAGE gel, and probed with an anti-ubiquitin antibody. The samples were also probed with MDM2 and p53 antibodies. 10 % of the sample used for IP was also loaded and showed as the Input sample. (e) Western blot analysis of B5/589 cells treated with MI-219. The cells were also incubated with MG-132, for 4 h before cell lysis. (f) Western blot analysis of H1299 cells transfected with 2  $\mu$ g of indicated plasmids and lysed after 24 h. The cells were treated with MG-132 for 4 h before cell lysis.

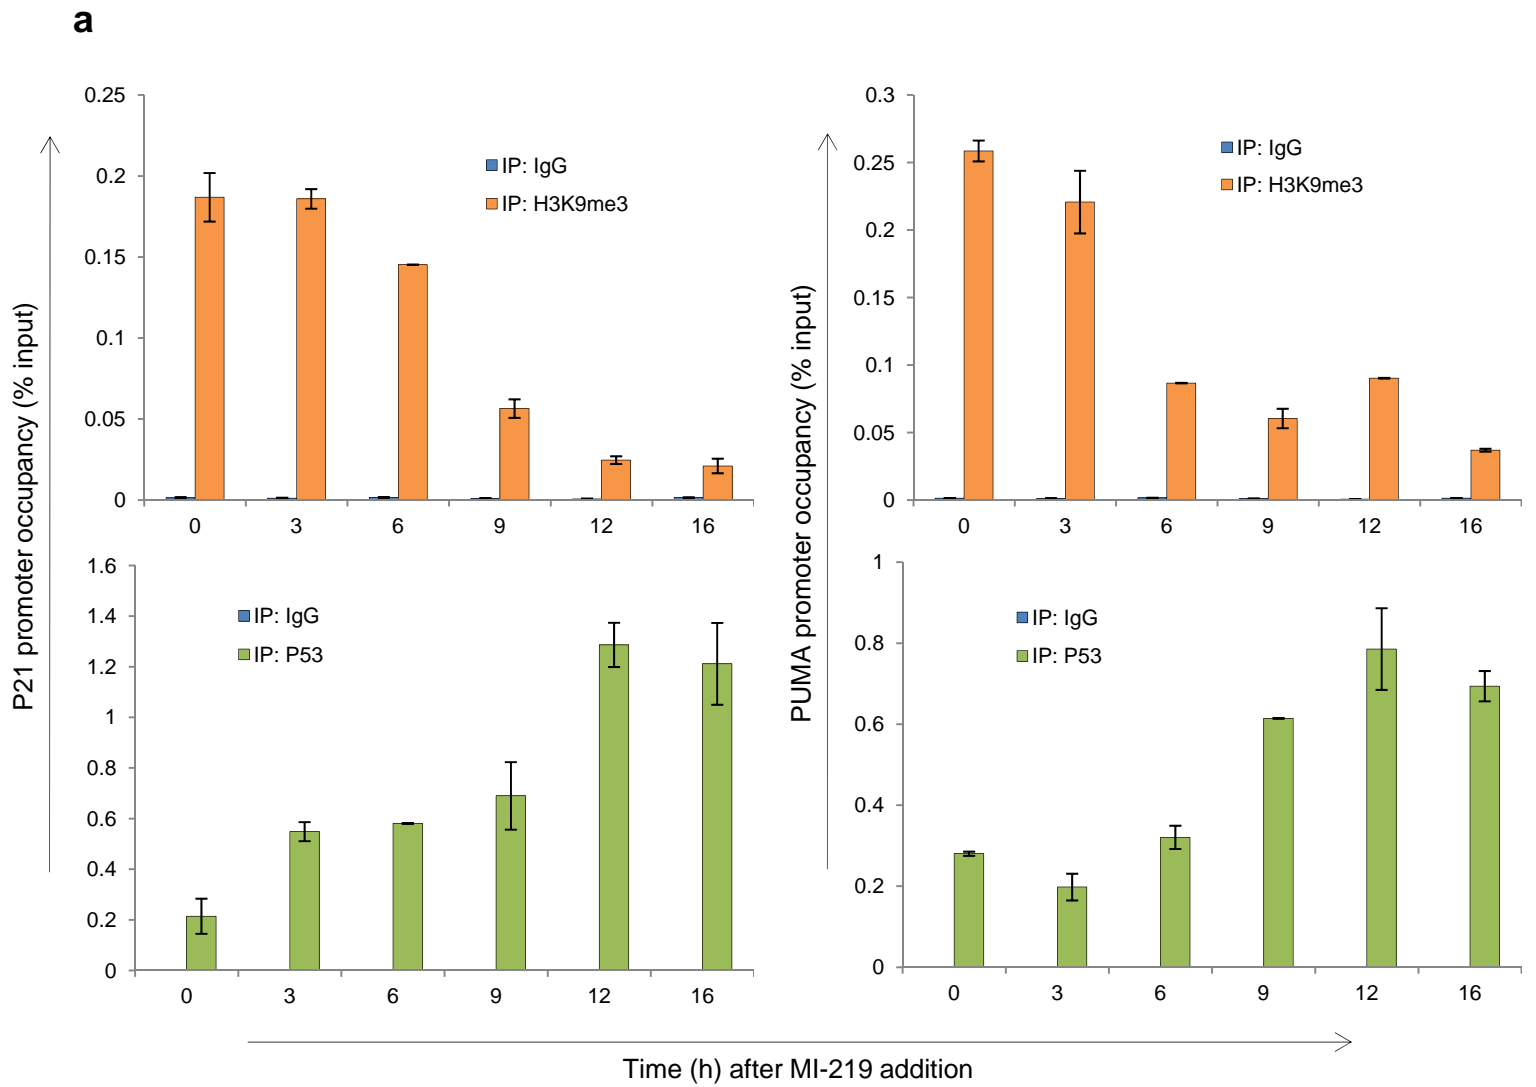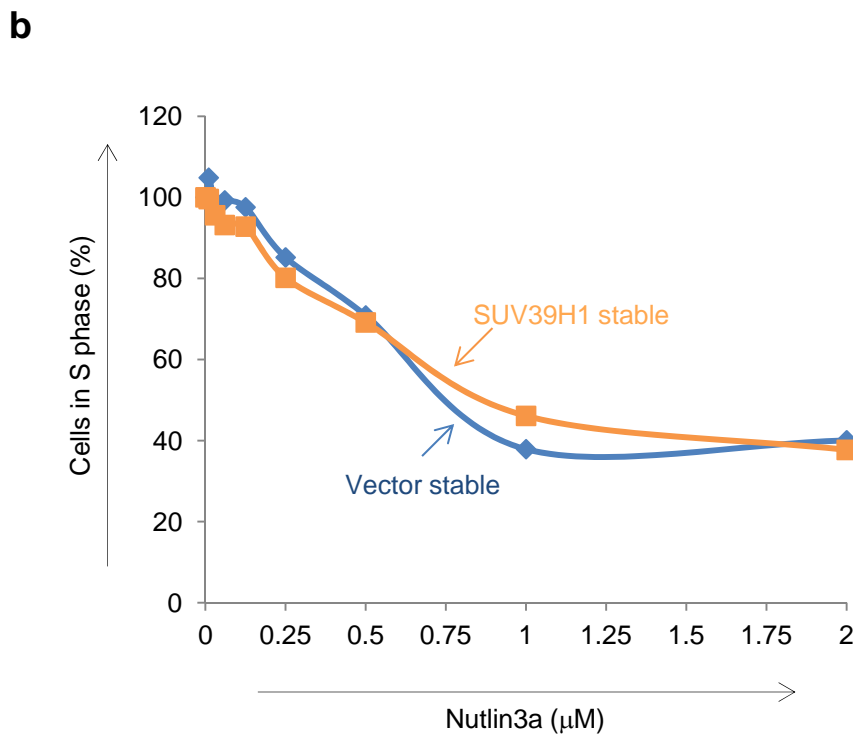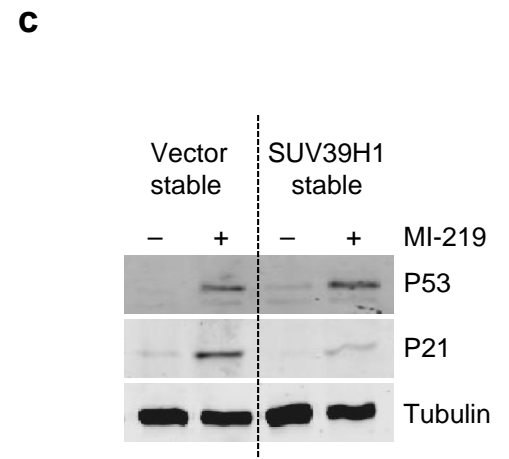

**Supplementary Figure 2: Induction of p53 abrogates the H3K9me3 heterochromatin mark.** (a) ChIP analysis in B5/589 cells showing the occupancy of either H3K9me3 or p53 on p53 target promoters at the indicated time points after treatment with MI-219. The target sequences were detected by quantitative real-time PCR analysis of eluted DNA. The relative occupancy of either H3K9me3 or p53, over the % input is shown in the form of bar diagram. (b) Propidium iodide (PI) staining of HCT116 cells overexpressing SUV39H1 and treated with increasing doses of Nutlin3a as indicated. The % of cells which are in S phase of cell cycle is shown in the line diagram. (c) Western blot analysis of B5/589 cells overexpressing SUV39H1 treated with MI-219.

# Supplementary Figure 3; Mungamuri et al., 2012

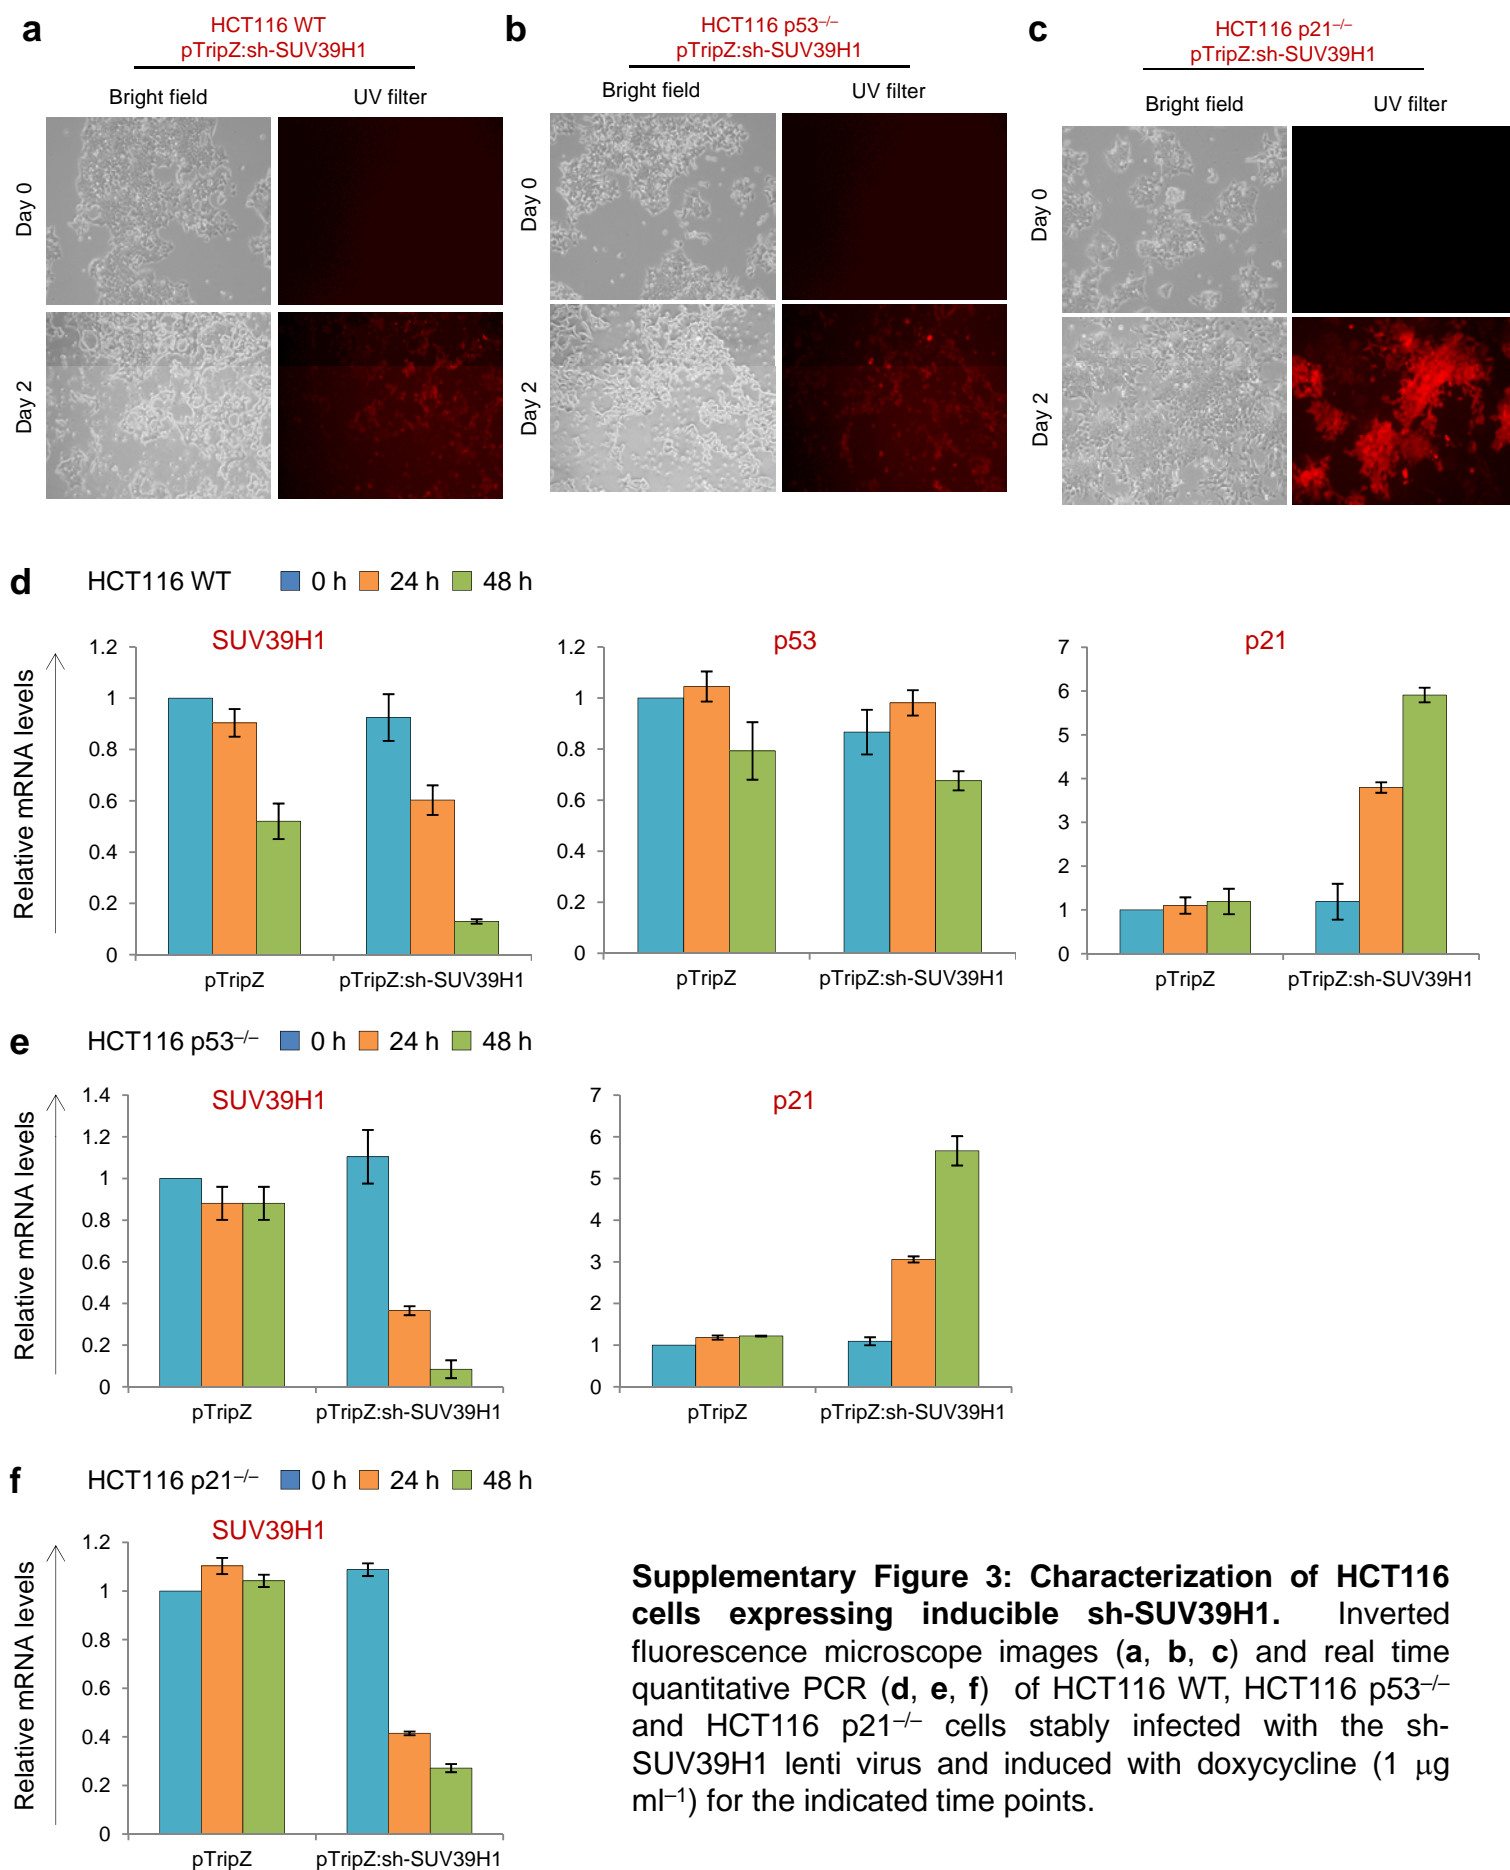

# Supplementary Figure 4; Mungamuri et al., 2012

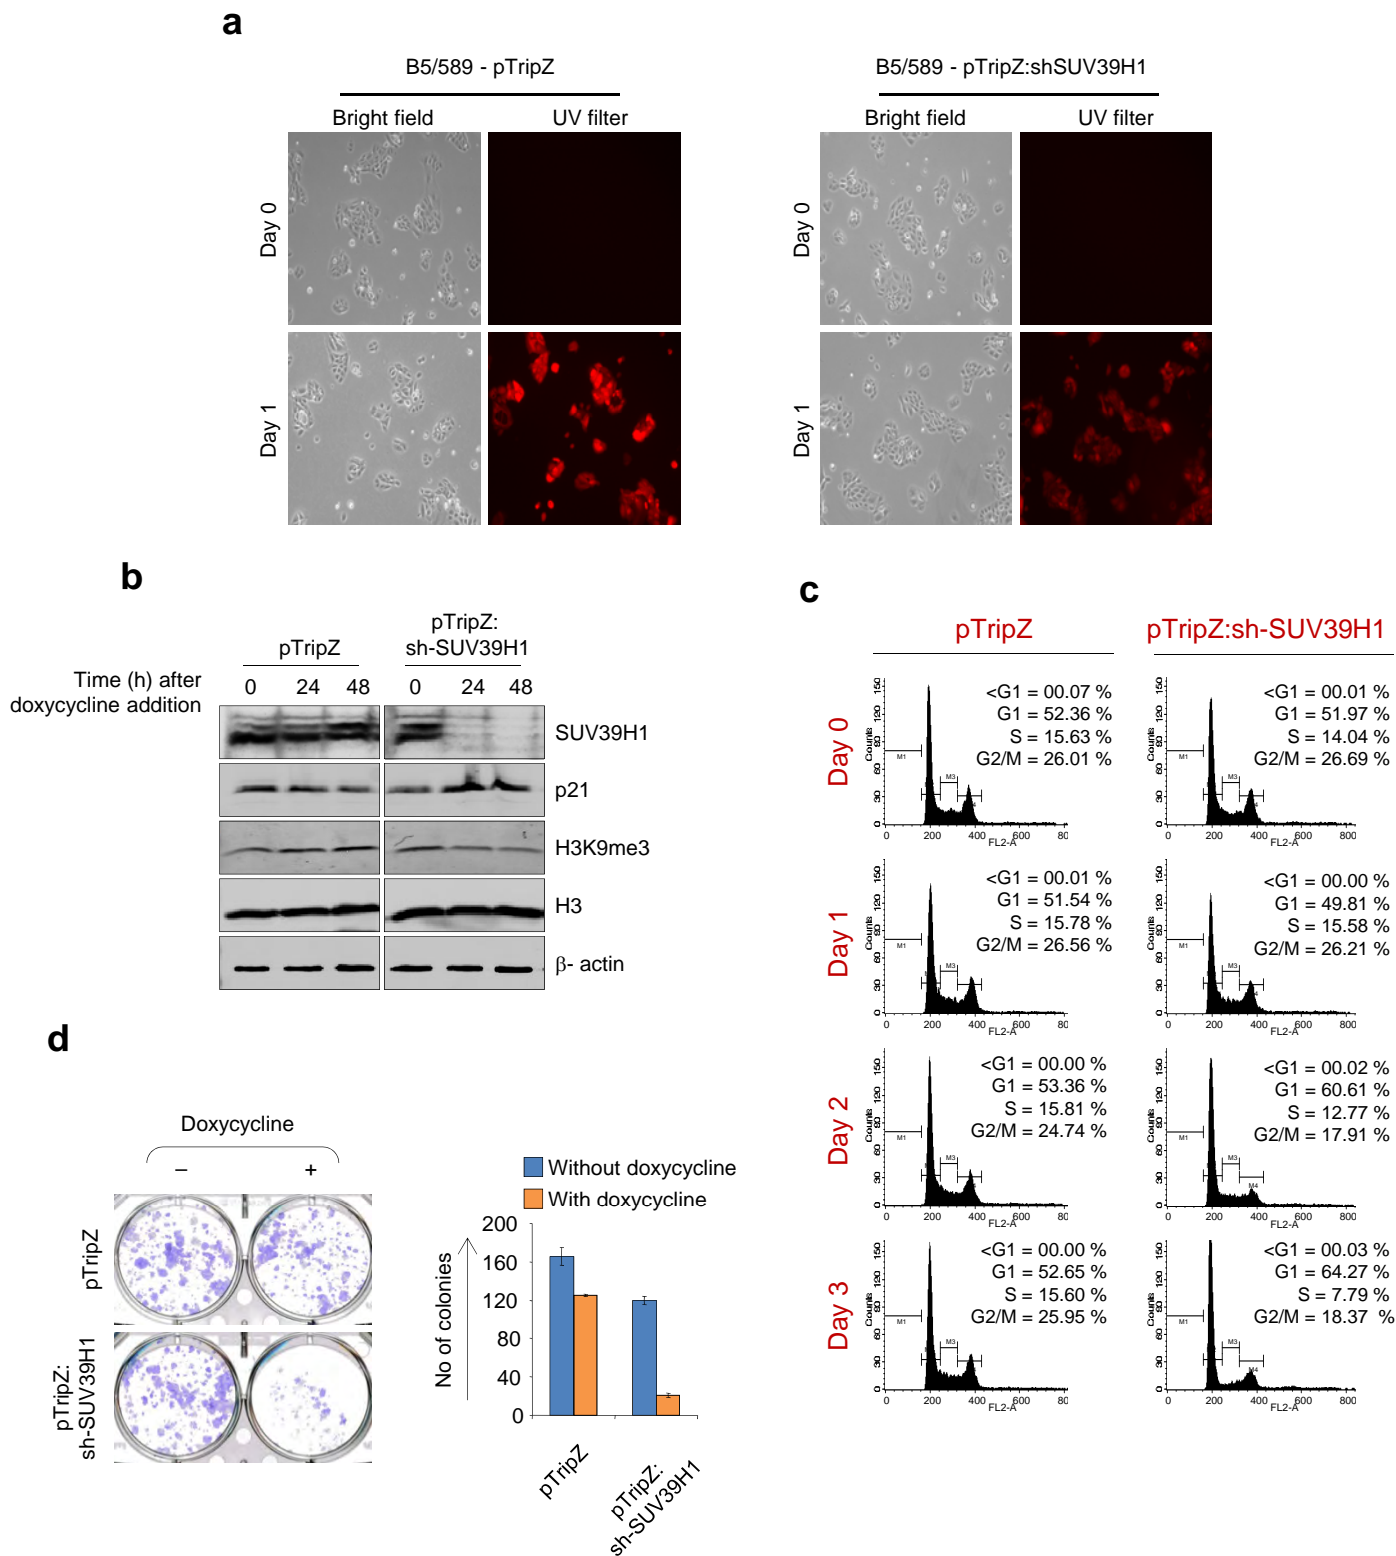

**Supplementary Figure 4: Silencing of SUV39H1 induces p21 and cell cycle arrest.** (a) Inverted fluorescence microscope images of B5/589 cells stably infected sh-SUV39H1 lenti virus and induced for 24 h to examine the expression of red fluorescent protein (RFP). (b) Western blot analysis of B5/589 cells stably expressing sh-SUV39H1 and induced for the indicated time points. (c) Cell cycle analysis by Propidium iodide (PI) staining in B5/589 cells stably transduced with inducible sh-SUV39H1. Day 0, 1, 2 and 3 represent time after addition of doxycycline into the medium. (d) Colony formation assay analyzing the effect of long term culturing of B5/589 cells stably transduced with sh-SUV39H1. The number of colonies formed after 9 days was counted and is shown in the form of a bar diagram.

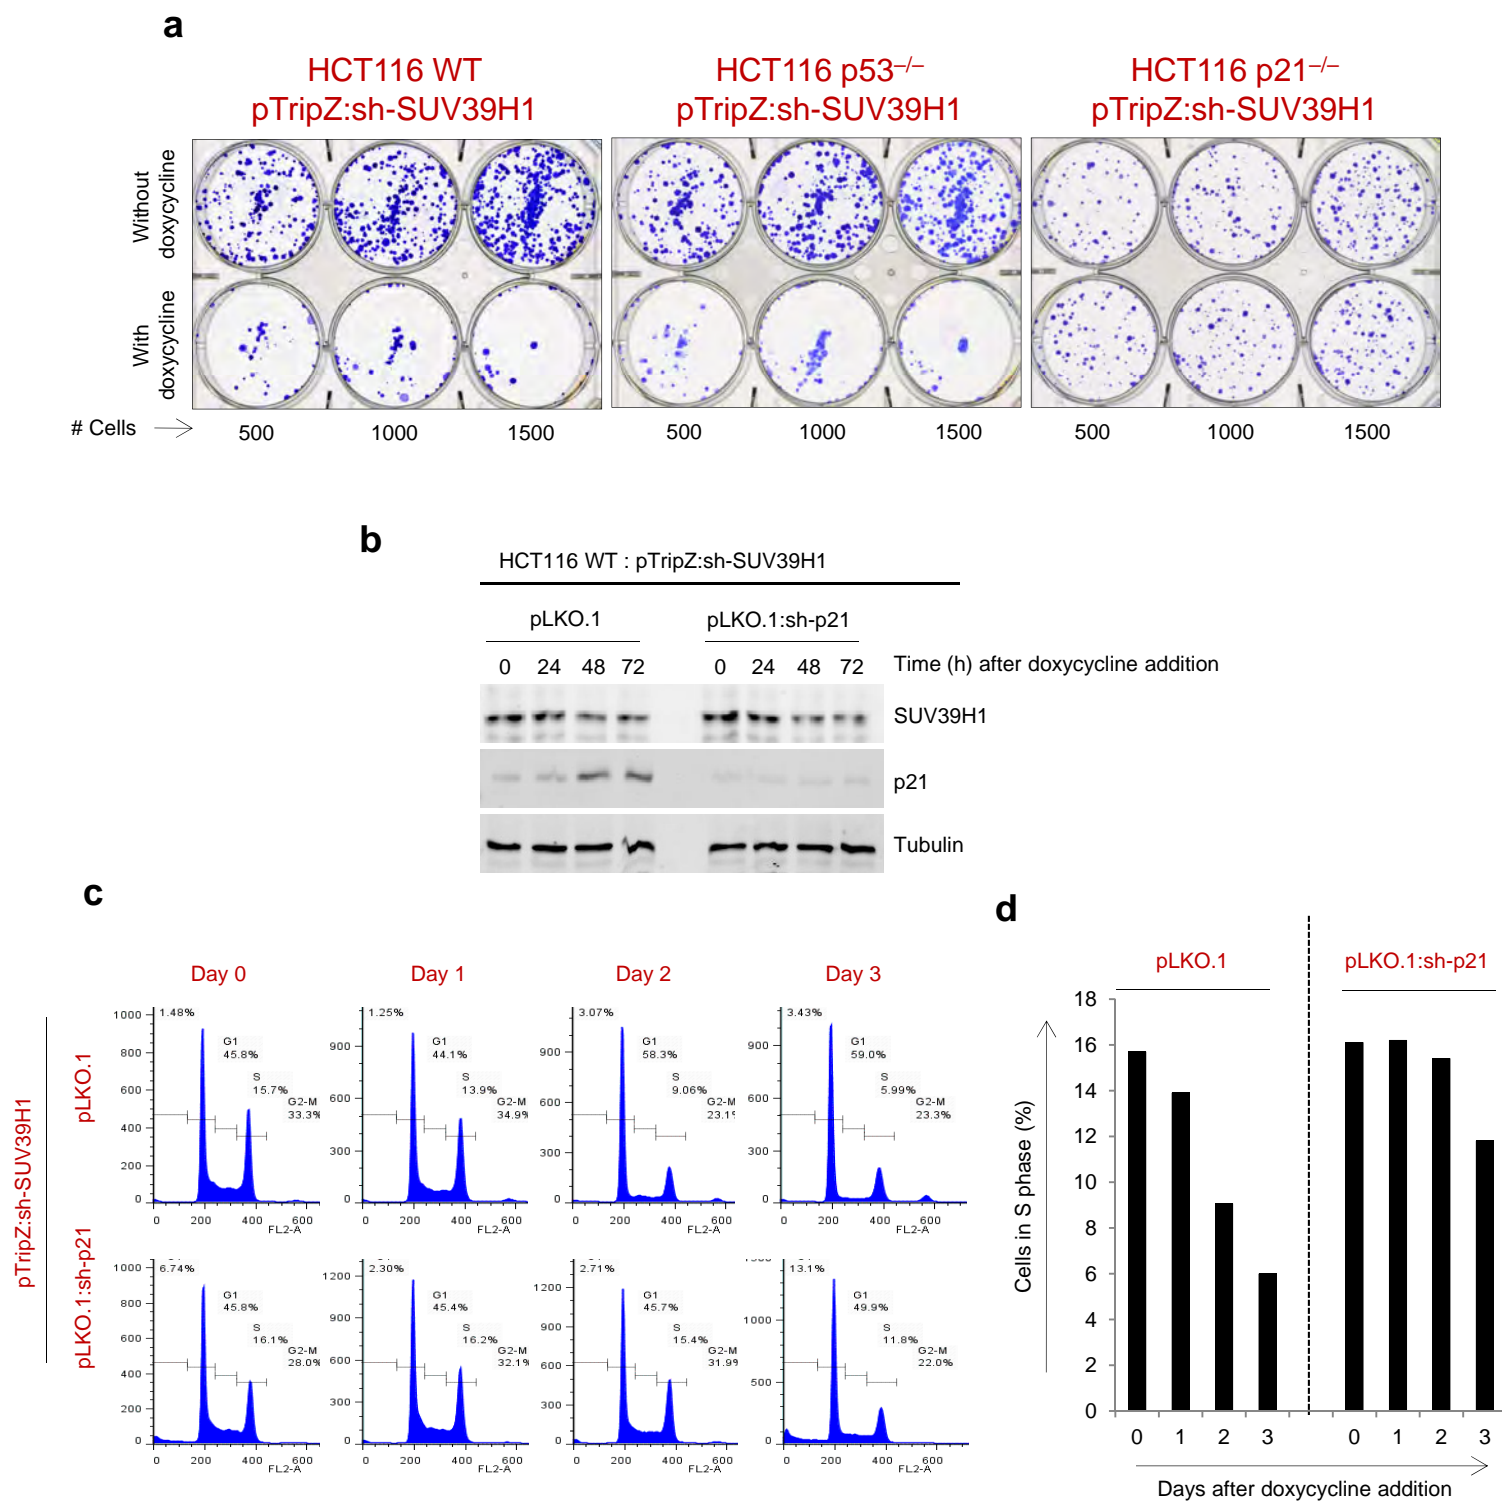

**Supplementary Figure 5: p21 is required for sh-SUV39H1-induced colony suppression ability.**

(a) Colony formation assay analyzing the effect of long term culturing of HCT116 WT, HCT116 p53<sup>-/-</sup> and HCT116 p21<sup>-/-</sup> cells stably transduced with sh-SUV39H1. (b) HCT116 WT cells with pTripZ:sh-SUV39H1 alone or with sh-p21 were treated with doxycycline (1  $\mu\text{g ml}^{-1}$ ) for indicated time points and analyzed for the expression of the indicated proteins. (c) Propidium iodide (PI) staining of HCT116 WT cells with pTripZ:sh-SUV39H1 alone or with sh-p21 were treated with doxycycline (1  $\mu\text{g ml}^{-1}$ ) for indicated time points. The % of cells in S phase of the cell cycle is shown in (d).

# Supplementary Figure 6; Mungamuri et al., 2012

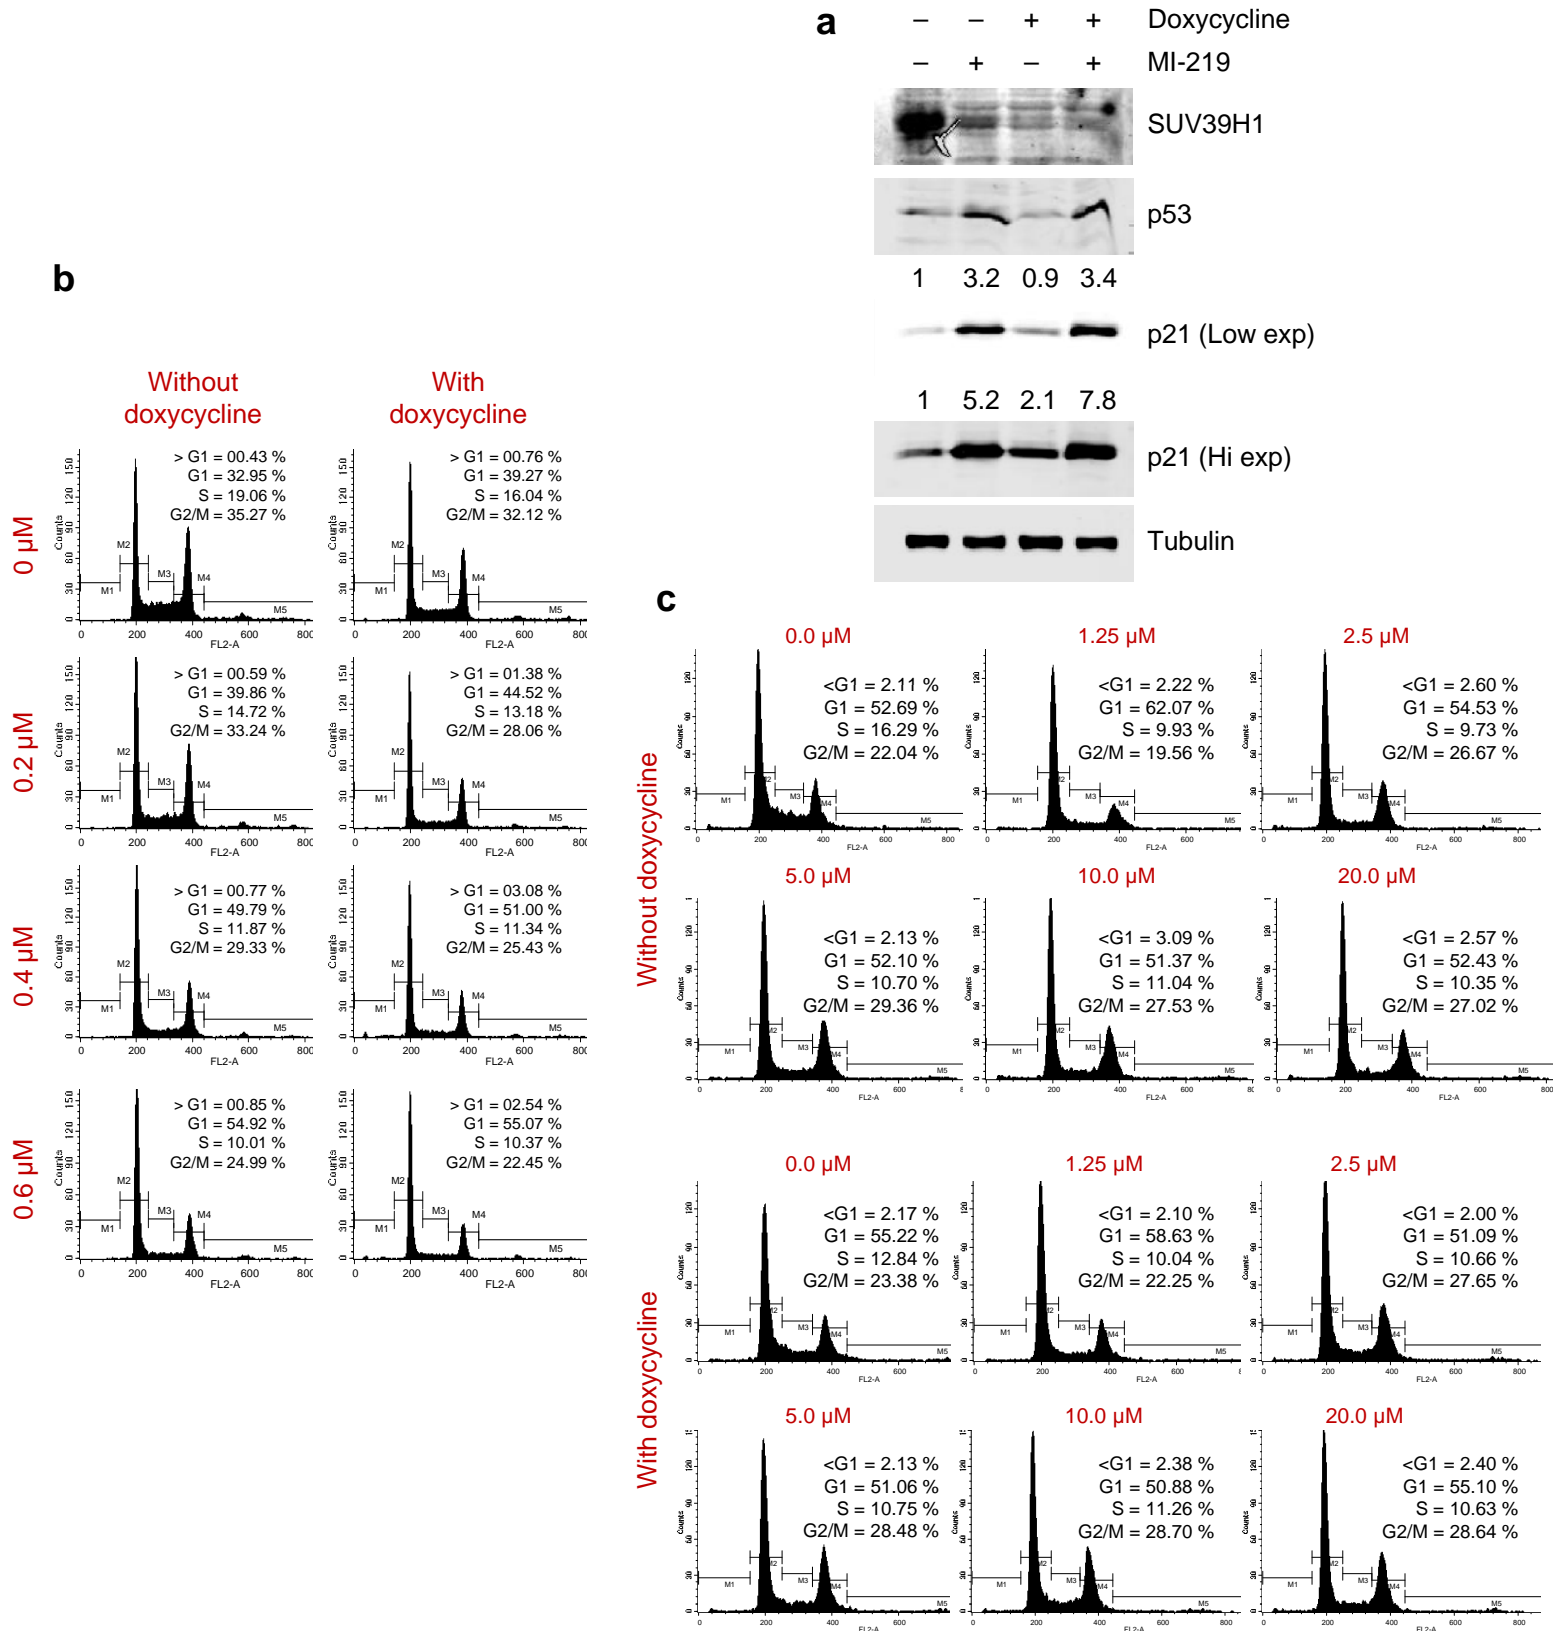

**Supplementary Figure 6: SUV39H1 silencing does not cooperate with p53 in inducing cell cycle arrest.** (a) Western blot analysis of indicated proteins in B5/589 pTripZ:sh-SUV39H1 cells. The cells were pre-silenced for SUV39H1 for 48 h before treating the cells with MI-219. (b) Propidium iodide (PI) staining of B5/589 pTripZ:sh-SUV39H1 cells. The cells were pre-silenced for SUV39H1 for 48 h before treating the cells with increasing doses of Nutlin3a. The % of cells in each phase of the cell cycle is also shown. (c) Propidium iodide (PI) staining of HCT116 WT pTripZ:sh-SUV39H1 cells. The cells were pre-silenced for SUV39H1 for 48 h before treating the cells with increasing doses of cisplatin. The % of cells in each phase of the cell cycle was also shown.



**a**

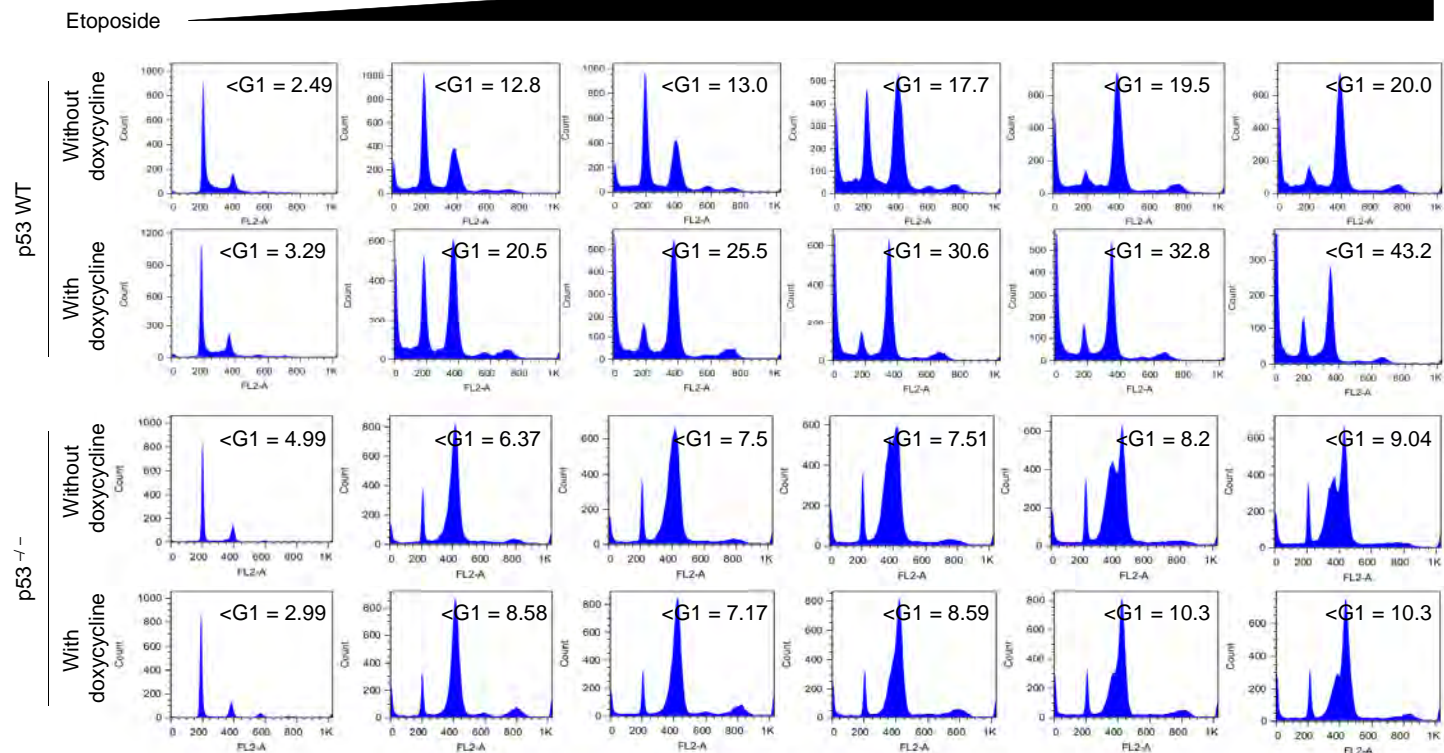

**b**

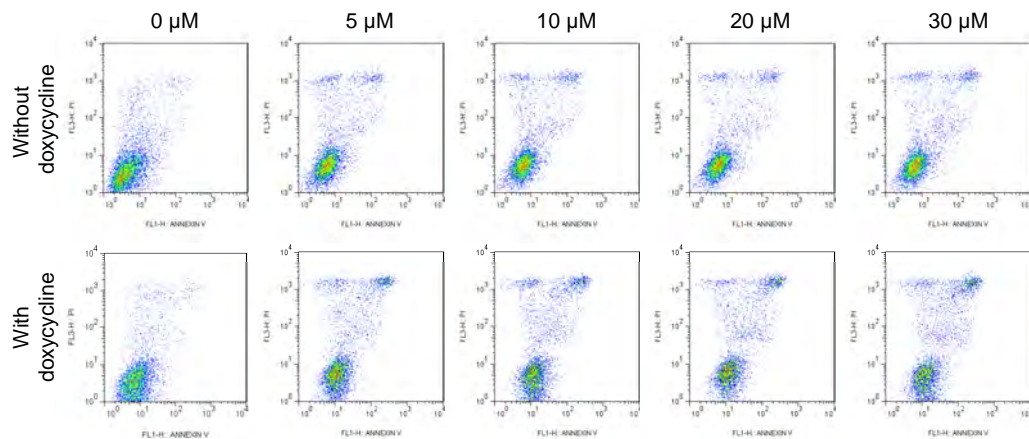

**c**

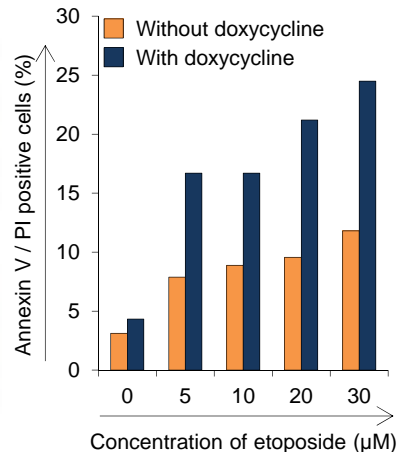

**d**

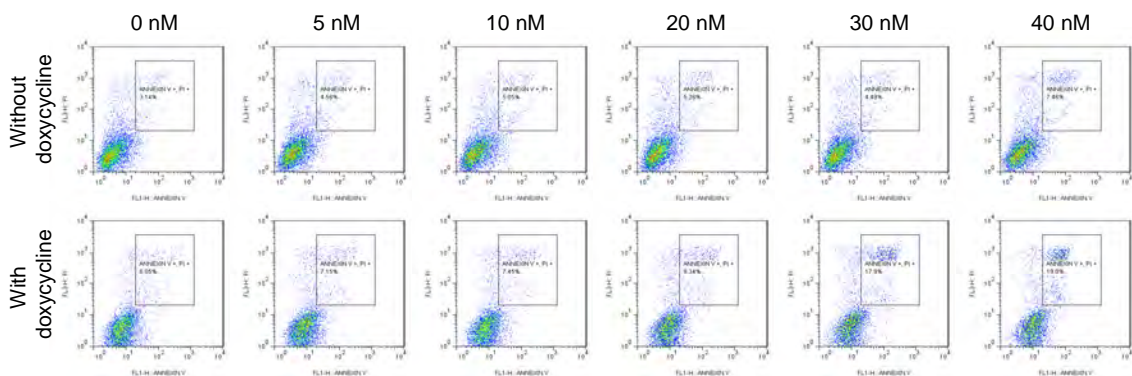

**e**

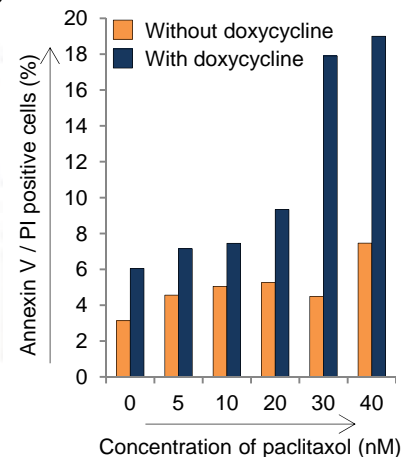

**Supplementary Figure 7: Pre-silencing of SUV39H1 cooperates with chemotherapy induced apoptosis in a p53-dependent manner.** (a) Cell cycle analysis by Propidium iodide (PI) staining in HCT116 WT and HCT116 p53<sup>-/-</sup> cells stably transduced with sh-SUV39H1. The cells were pre-silenced for SUV39H1 for 48 h before treating with increasing doses of etoposide. The percentage of cells showing less than a 2N content of DNA (apoptosis) in each condition is also shown. (b, c) Annexin V staining in HCT116 WT cells stably transduced with sh-SUV39H1. The cells were pre-silenced for SUV39H1 for 48 h and treated with increasing doses of etoposide (b) or paclitaxol (d). The % of cells that were double positive for Annexin V and PI in each condition is shown in the form of bar diagram in (c) and (e) respectively.

# Supplementary Figure 8; Mungamuri et al., 2012

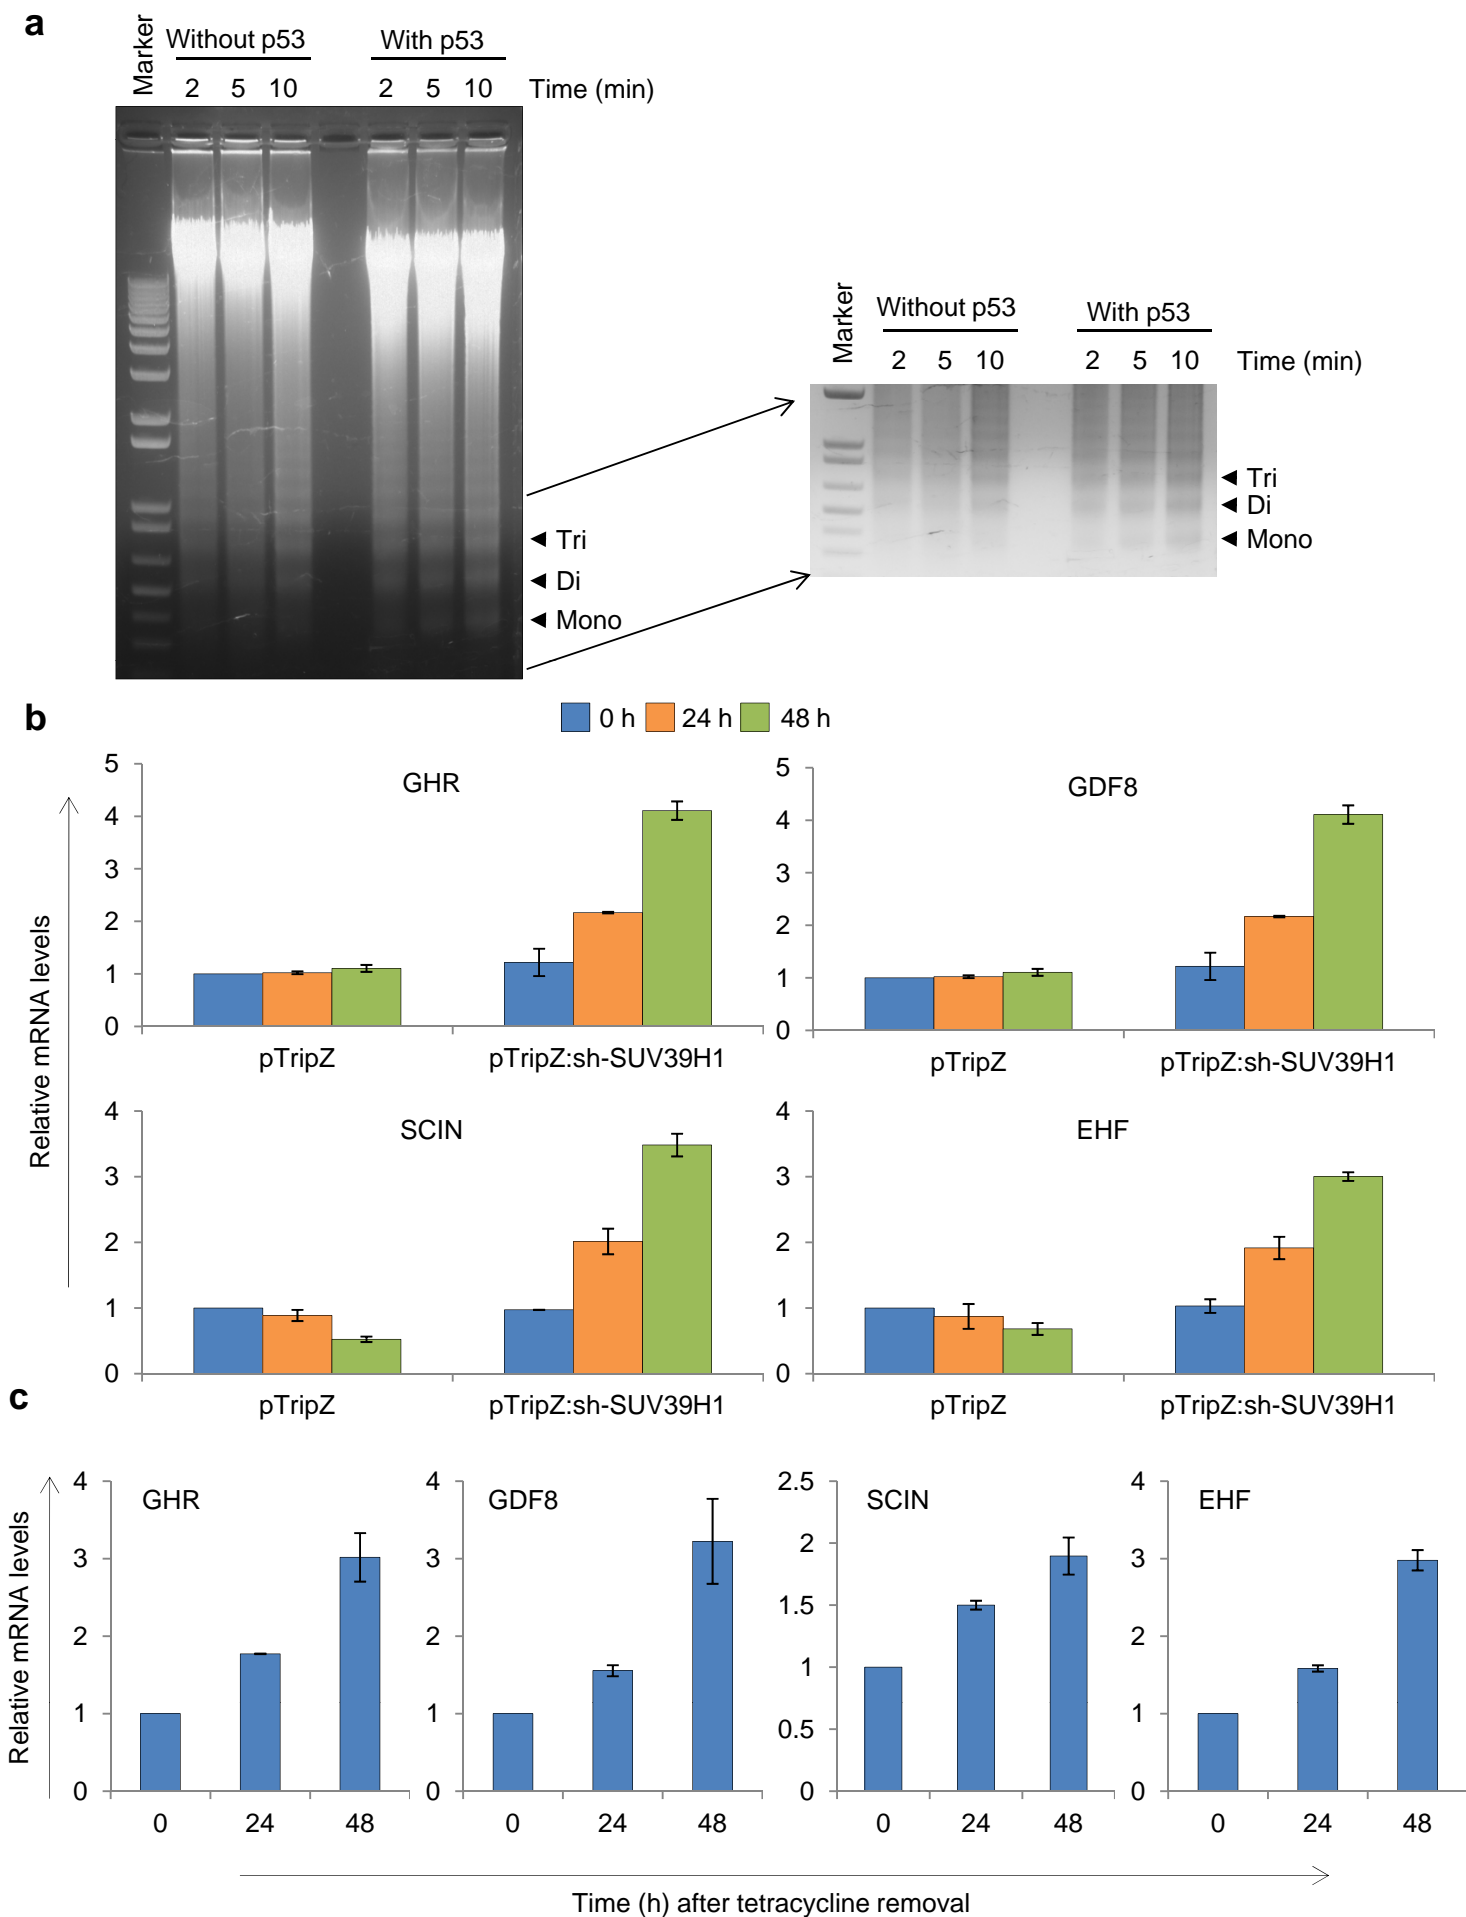

**Supplementary Figure 8: p53 alters the global transcription through downregulating SUV39H1.** (a) Micrococcal Nuclease (MNase) assay in EJ-p53 cells that were induced for p53 expression for 24 h. (b) Real-time quantitative PCR of B5/589 cells stably transduced with inducible sh-SUV39H1 and cultured in the presence of doxycycline for the indicated time points. (c) Real-time quantitative PCR of EJ-p53 cells induced for p53 for the indicated time points.

## Supplementary Table 1; PCR primers used in this study

### For Gene expression (Real time PCR)

| Gene Name | Forward Primer          | Reverse Primer          |
|-----------|-------------------------|-------------------------|
| p53       | CCCTCCCAGAAAACCTACC     | CTCCGTCATGTGCTGTGACT    |
| p21       | TGCCGAAGTCAGTTCCTTGT    | CATGGGTCTGACGGACATC     |
| SUV39H1   | ATATCCAGACTCAGAGAGCACC  | CAGCTCCCTTTCTAAGTCCTTG  |
| PUMA      | GACCTCAACGCACAGTACGA    | CACCTAATTGGGCTCCATCT    |
| PIDD      | GCTCTTGCTGTCTCACAACCTG  | AATCTCAGGAGGTAGCGTGTC   |
| FAS       | TCAGTACGGAGTTGGGGAAG    | TCCTCAATTCCAATCCCTTG    |
| MDM2      | AAGCCTGGCTCTGTGTGTA     | CTGATCCAACCAATCACCTG    |
| TP53INP1  | TCTCATTGAACATCCCAGCA    | TATGCTGCCCCATTTCAATT    |
| APAF1     | TGTCTGTCACCAGGGTACAGT   | CGTTGTGGCCCCTCAATTCA    |
| PIG3      | CTCAGTACGTCACTGTCCCC    | GATTAGCACATAGTCTCCAGCC  |
| NOXA      | CCGTGTGTAGTTGGCATCTC    | GCACACTCGACTTCCAGCTC    |
| GHR       | GTCTGCAAAGTGTTAATCCAGGC | CTCTCGCTCAGGTGAACGG     |
| GDF8      | GACGATTATCACGCTACAACGG  | TCCATAGTTGGGCCTTTACTACT |
| SCIN      | ATGGCTTCGGGAAAGTTTATGT  | CATCCACCATATTGTGCTGGG   |
| EHF       | CAGTGCAGTAGTGACCTGTTC   | CTGTGCTACCATAGTTGGTGTC  |
| 18S       | GTAACCCGTTGAACCCATT     | CCATCCAATCGGTAGTAGCG    |

### For ChIP

| Gene Name | Forward Primer       | Reverse Primer         |
|-----------|----------------------|------------------------|
| SUV39H1   | GGCACAAATGGAAGCCAG   | ACAGCGGCGGTAGCTAAA     |
| PUMA      | GCGAGACTGTGGCCTTGTGT | CGTTCAGGGTCCACAAAGT    |
| NOXA      | CTCCTCTGCGGTGATTAAGG | GGGAAGGGTTTAACCAGGAG   |
| p21       | CTGGACTGGGCACTTTGTC  | CCCTTCCTCACCTGAAAACA   |
| PIG3      | TGCTCCGCGAGGATACAG   | CCACCTTCAGGAGGACTTCA   |
| TP53INP1  | AAACCCTCGACCCTTCACTC | CGAGAGGTTGTCACCAACG    |
| MDM2      | TCGGGTCACTAGTGTGAACG | CACTGAACACAGCTGGGAAA   |
| PIDD      | CATCCAGAGTCCCTGTTTCC | CCGAATCCTCTGAAGCATCT   |
| AChR      | CCTTCATTGGGATCACCACG | GGAGATGAGTACCAGCAGGTTG |
